# Supplementary material
Source: ML conference proceedings conference paper supplement (https://proceedings.neurips.cc/paper_files/paper/2023/hash/8d7060b2ee6ff728692398783e3d59d1-Abstract.html)
Supplement: Supplementary file 1 [file 8d7060b2ee6ff728692398783e3d59d1-Supplemental-Conference.zip]

Archive with 2 entries (2 files):
- uniform_semantic_appendix.pdf
- uniform_semantic_code.tar.gz
